# Supplementary material for: Metabolic engineering of biomass for high energy density: oilseed-like triacylglycerol yields from plant leaves
Source: PubMed Central journal article supplement — Plant Biotechnol J. 2013 Oct 24;12(2):231–9. doi: 10.1111/pbi.12131 (PMC4285938; doi:10.1111/pbi.12131), 2013-10-24
Supplement: pbi0012-0231-SD1.pdf [file pbi0012-0231-SD1.pdf]

## Supplementary

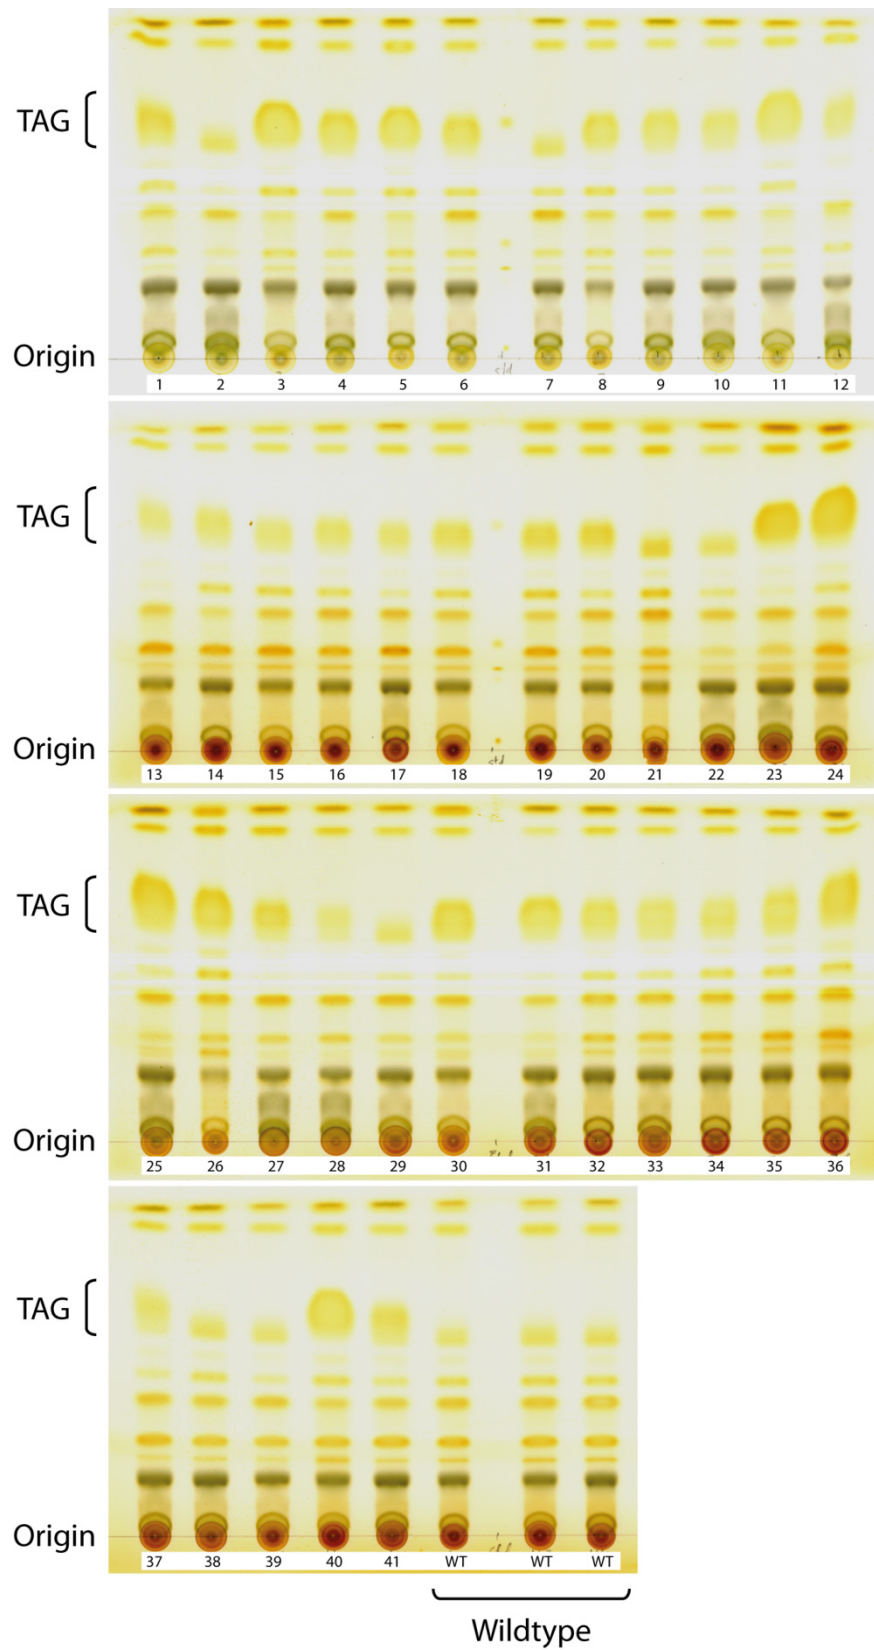

**Supplementary Figure 1** TLC screening of leaf tissue of *Nicotiana tabacum* T<sub>0</sub> events at vegetative stage as described in materials and methods. Lanes 42-44 are wildtype controls which have relatively low TAG compared with the T<sub>0</sub> transgenic event in lane 3 (described in this study).

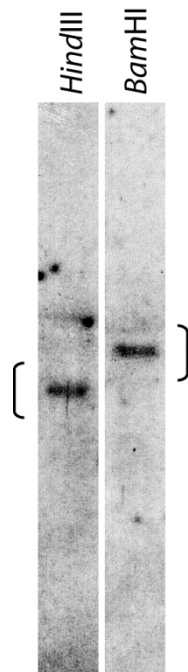

**Supplementary Figure 2** Southern blot of transgenic *Nicotiana tabacum* leaf DNA with *NPTII* probe demonstrating that the T<sub>0</sub> line displaying maximum TAG levels was a single-copy event. This was corroborated by the segregation pattern of subsequent generations.

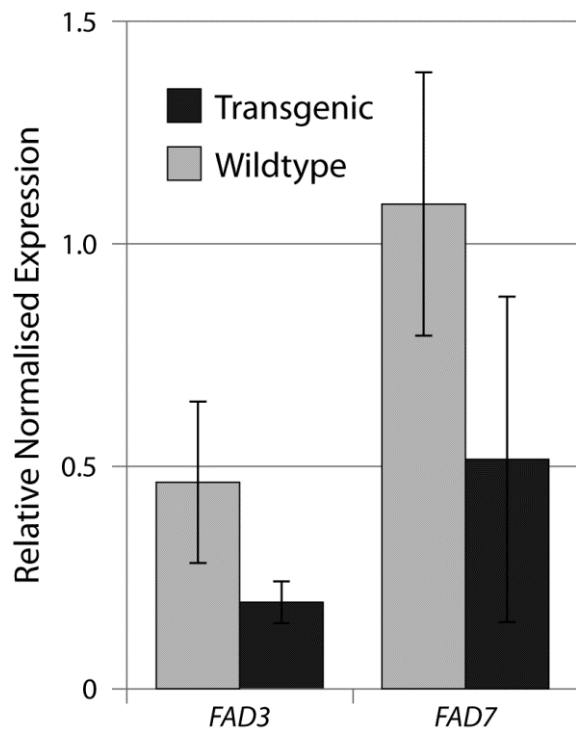

**Supplementary Figure 3** Expression analysis of *fad3* and *fad7* fatty acid desaturase genes in wildtype and transgenic T<sub>1</sub> *Nicotiana tabacum* leaf tissue as quantified by qRT-PCR. Error bars denote standard deviations (n=3).

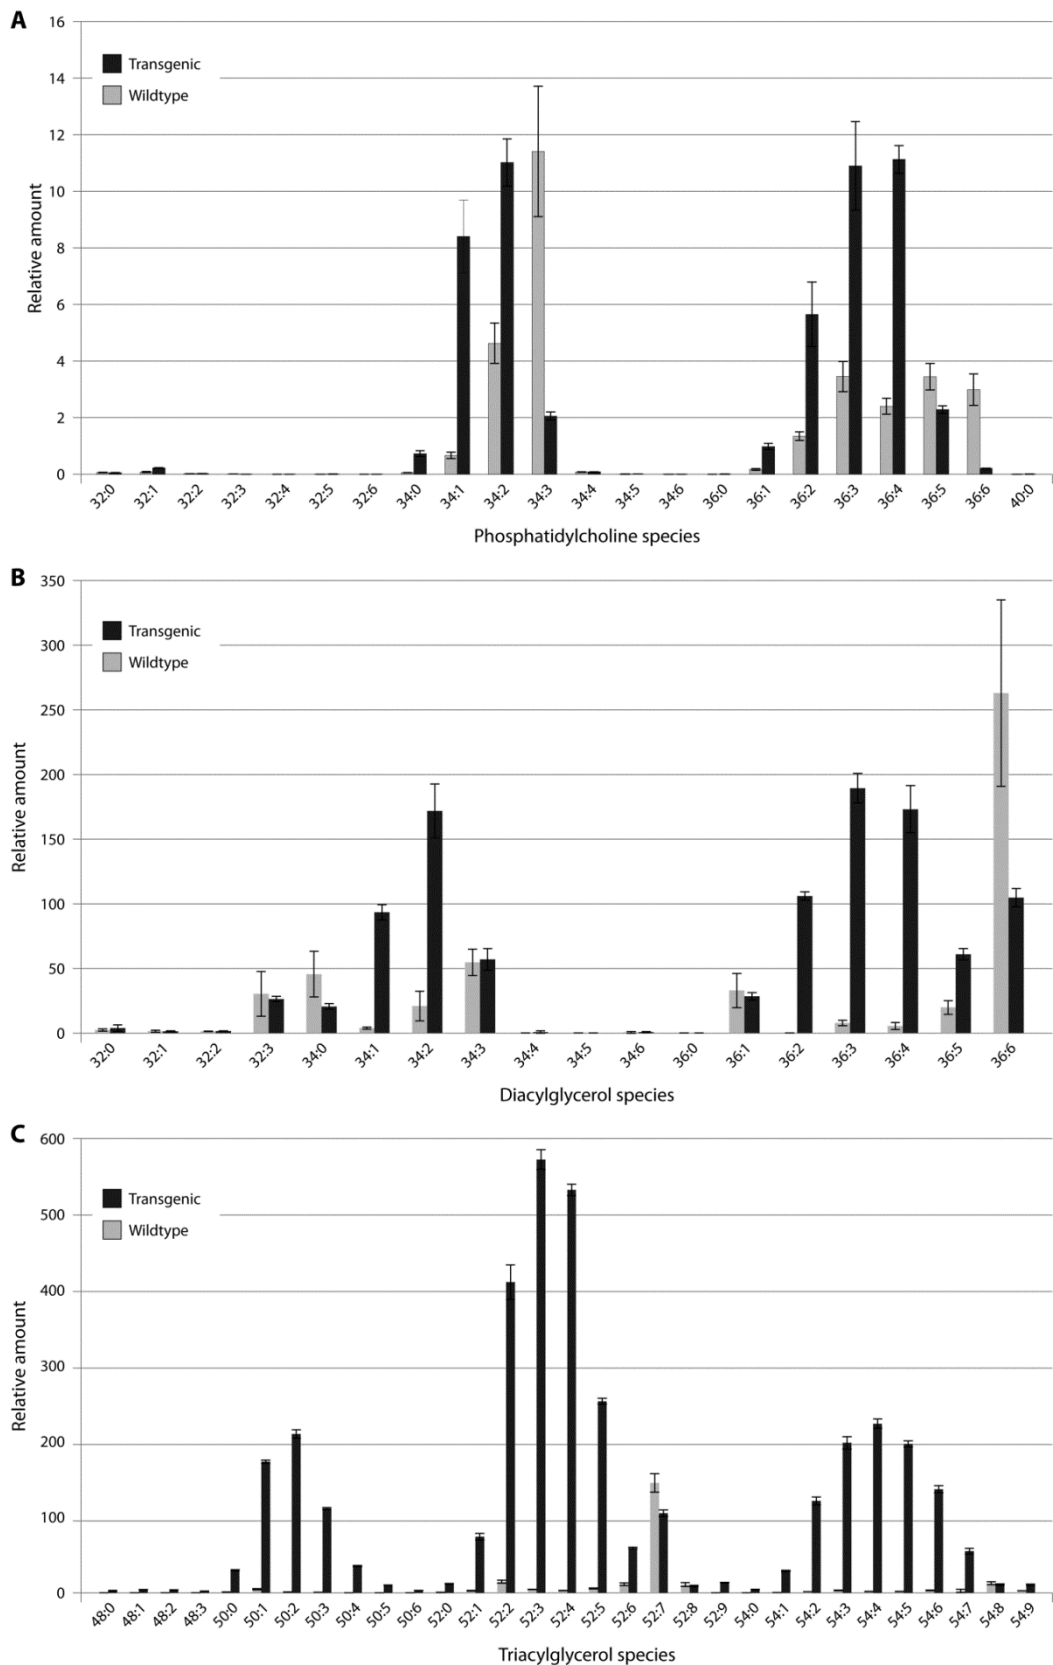

**Supplementary Figure 4** LC-MS analysis of different phosphatidylcholine (a), diacylglycerol (b) and triacylglycerol (c) molecular species in wildtype and transgenic T<sub>1</sub> *Nicotiana tabacum* leaf tissue. Error bars denote standard deviations (n=3).

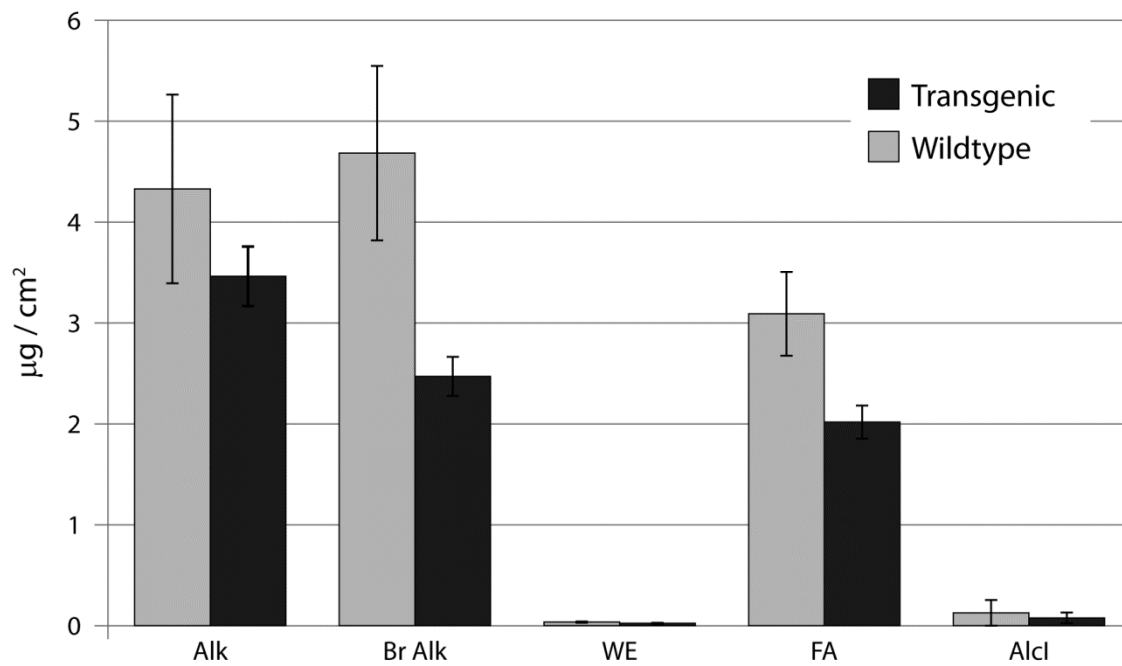

**Supplementary Figure 5** GC analysis of cuticular wax composition on wildtype and T<sub>1</sub> transgenic leaves. Alk, alkanes; Br Alk, branched alkanes; WE, wax esters; FA, fatty acids; Alcl, fatty alcohols. Error bars denote standard deviations (n=3).

**Supplementary Table 1** Representative triacylglycerol (TAG) and total fatty acid (TFA) levels (% dry weight) and fatty acid profiles in leaves of *Nicotiana tabacum* primary transformant #3 at the onset of senescence. A TLC chromatogram of this line is depicted in lane 3 of Supplementary Fig. 1.

|     | C14:0 | C16:0 | IsoC16:1 | C16:1Δ3 | C16:Δ9 | C16:3 | C18:0 | C18:1 | C18:1Δ11 | C18:2 | C18:3 | C20:0 | C20:1 | C20:2 | C20:3 | C22:0 | C24:0 | %    |
|-----|-------|-------|----------|---------|--------|-------|-------|-------|----------|-------|-------|-------|-------|-------|-------|-------|-------|------|
| TAG | 0.1   | 28.6  | 0.4      | 0.0     | 1.6    | 0.2   | 4.1   | 25.8  | 1.0      | 24.3  | 9.8   | 2.0   | 0.0   | 0.1   | 0.0   | 1.1   | 1.0   | 17.3 |
| TFA | 0.1   | 26.6  | 0.0      | 0.6     | 1.6    | 0.3   | 3.8   | 25.6  | 1.1      | 25.2  | 11.0  | 1.8   | 0.3   | 0.1   | 0.0   | 1.0   | 0.8   | 23.4 |

**Supplementary Table 2** Triacylglycerol content (% seed weight) and fatty acid profile in wildtype (WT) and pooled seed from a representative T<sub>1</sub> transgenic *Nicotiana tabacum* event.

|            | C14:0 | C16:0 | C16:Δ9 | C18:0 | C18:1 | C18:1Δ11 | C18:2 | C18:3 | C20:0 | C20:1 | C20:2 | C22:0 | C24:0 | %    |
|------------|-------|-------|--------|-------|-------|----------|-------|-------|-------|-------|-------|-------|-------|------|
| WT         | 0.0   | 9.8   | 0.1    | 3.3   | 11.1  | 0.7      | 74.2  | 0.4   | 0.2   | 0.1   | 0.0   | 0.1   | 0.0   | 35.5 |
| Transgenic | 0.0   | 9.9   | 0.1    | 3.5   | 16.4  | 0.7      | 68.2  | 0.4   | 0.4   | 0.1   | 0.0   | 0.2   | 0.1   | 37.2 |

**Supplementary Table 3** Total fatty acid levels (% dry weight) and fatty acid profile in wildtype (WT) and T<sub>1</sub> transgenic *Nicotiana tabacum* senescing leaf tissue at the onset of senescence. Error bars represent standard deviations (n ≥ 3).

|            | <b>C14:0</b> | <b>C16:0</b> | <b>C16:Δ9</b> | <b>C16:3</b> | <b>C18:0</b> | <b>C18:1</b> | <b>C18:1Δ11</b> | <b>C18:2</b> | <b>C18:3</b> | <b>C20:0</b> | <b>C20:1</b> | <b>C22:0</b> | <b>C24:0</b> | <b>%</b>   |
|------------|--------------|--------------|---------------|--------------|--------------|--------------|-----------------|--------------|--------------|--------------|--------------|--------------|--------------|------------|
| WT         | 0.8 ± 0.2    | 18.2 ± 0.7   | 3.6 ± 0.5     | 1.8 ± 0.2    | 6.1 ± 0.5    | 3.3 ± 0.5    | 0.6 ± 0.1       | 14.8 ± 1.0   | 46.4 ± 3.8   | 1.2 ± 0.3    | 1.5 ± 0.4    | 1.1 ± 0.2    | 0.5 ± 0.1    | 0.8 ± 0.0  |
| Transgenic | 0.1 ± 0.0    | 25.3 ± 1.4   | 2.3 ± 0.1     | 0.2 ± 0.0    | 3.8 ± 0.2    | 29.6 ± 3.8   | 1.3 ± 0.1       | 25.4 ± 1.7   | 8.1 ± 1.0    | 1.7 ± 0.1    | 0.3 ± 0.2    | 1.1 ± 0.1    | 0.8 ± 0.1    | 17.7 ± 0.7 |



**Supplementary Table 4** MS/MS (Q-TOF) identification of major triacylglycerols (TAG) and diacylglycerol (DAG) molecular species in wildtype and T<sub>1</sub> transgenic *Nicotiana tabacum* leaf tissue.

| <b>Molecular species</b> | <b>Wildtype<br/>Major component</b> | <b>Major component</b>                 | <b>Transgenic<br/>Minor component</b>  |
|--------------------------|-------------------------------------|----------------------------------------|----------------------------------------|
| TAG                      |                                     |                                        |                                        |
| 50:1                     |                                     | C16:0/C16:0/C18:1                      |                                        |
| 50:2                     |                                     | C16:0/C16:0/C18:2                      | C16:0/C16:1/C18:1                      |
| 50:3                     |                                     | C16:0/C16:0/C18:3                      | C16:0/C16:1/C18:2                      |
| 52:1                     |                                     | C16:0/C18:0/C18:1                      |                                        |
| 52:2                     | C16:0/C18:1/C18:1                   | C16:0/C18:1/C18:1                      |                                        |
| 52:3                     |                                     | C16:0/C18:1/C18:2                      |                                        |
| 52:4                     |                                     | C16:0/C18:2/C18:2                      | C16:0/C18:1/C18:3                      |
| 52:5                     |                                     | C16:0/C18:2/C18:3                      |                                        |
| 52:7                     | C16:3/C18:1/C18:3                   | C16:3/C18:1/C18:3                      | C16:1/C18:3/C18:3                      |
| 54:2                     |                                     | C18:0/C18:1/C18:1                      |                                        |
| 54:3                     |                                     | C18:0/C18:1/C18:2                      | C18:1/C18:1/C18:1                      |
| 54:4                     |                                     | C18:1/C18:1/C18:2                      | C18:0/C18:1/C18:3<br>C18:0/C18:2/C18:2 |
| 54:5                     |                                     | C18:1/C18:1/C18:3<br>C18:1/C18:2/C18:2 | C18:0/C18:2/C18:3                      |
| 54:6                     |                                     | C18:2/C18:2/C18:2                      | C18:1/C18:2/C18:3                      |
| 54:7                     |                                     | C18:2/C18:2/C18:3                      | C18:1/C18:3/C18:3                      |
| DAG                      |                                     |                                        |                                        |
| 34:1                     |                                     | C16:0/C18:1                            |                                        |
| 34:2                     |                                     | C16:0/C18:2                            |                                        |
| 36:2                     |                                     | C18:1/C18:1                            |                                        |
| 36:3                     |                                     | C18:1/C18:2                            |                                        |
| 36:4                     | C18:2/C18:2                         | C18:2/C18:2<br>C18:1/C18:3             |                                        |
| 36:5                     | C18:2/C18:3                         | C18:2/C18:3                            |                                        |
| 36:6                     |                                     | C18:3/C18:3                            |                                        |

**Supplementary Table 5** Triacylglycerol (TAG) levels (% dry weight) and TAG fatty acid profile in stem and root tissues of wildtype (WT) and T<sub>1</sub> transgenic *Nicotiana tabacum* line. Error bars represent standard deviations (n=2, wildtype; N=3, transgenic).

| Plant      | Tissue      | C14:0     | C16:0      | C16:1     | C18:0     | C18:1      | C18:1Δ11  | C18:2      | C18:3       | C20:0     | C20:1     | C20:2     | C22:1     | C24:0     | C24:1     | %         |
|------------|-------------|-----------|------------|-----------|-----------|------------|-----------|------------|-------------|-----------|-----------|-----------|-----------|-----------|-----------|-----------|
| WT         | Young stem  | 0.0       | 15.8 ± 3.6 | 0.4 ± 0.6 | 5.0 ± 0.3 | 11.3 ± 9.2 | 0.4 ± 0.5 | 34.8 ± 4.7 | 31.3 ± 10.4 | 0.6 ± 0.9 | 0.0       | 0.0       | 0.0       | 0.4 ± 0.6 | 0.0       | 0.0       |
| Transgenic | Young stem  | 0.2 ± 0.0 | 26.5 ± 1.2 | 1.7 ± 0.2 | 3.7 ± 0.1 | 19.6 ± 1.1 | 1.5 ± 0.0 | 36.1 ± 0.5 | 5.8 ± 0.1   | 1.7 ± 0.0 | 0.3 ± 0.0 | 0.4 ± 0.0 | 1.1 ± 0.0 | 0.0       | 1.3 ± 0.1 | 0.8 ± 0.1 |
| WT         | Mature stem | 0.0       | 8.0 ± 0.7  | 0.0       | 3.2 ± 0.1 | 2.3 ± 0.3  | 0.0       | 44.0 ± 1.0 | 42.4 ± 2.0  | 0.0       | 0.0       | 0.0       | 0.0       | 0.0       | 0.0       | 0.1 ± 0.0 |
| Transgenic | Mature stem | 0.1 ± 0.0 | 28.7 ± 0.2 | 2.4 ± 0.0 | 3.4 ± 0.0 | 21.1 ± 0.8 | 1.7 ± 0.0 | 33.9 ± 0.4 | 4.6 ± 0.1   | 1.5 ± 0.0 | 0.3 ± 0.0 | 0.3 ± 0.0 | 1.0 ± 0.0 | 0.0       | 1.1 ± 0.0 | 1.1 ± 0.1 |
| WT         | Root        | 0.3 ± 0.3 | 8.2 ± 0.7  | 1.4 ± 0.2 | 2.3 ± 0.5 | 3.8 ± 0.5  | 0.3 ± 0.3 | 62.2 ± 1.5 | 21.3 ± 0.9  | 0.0       | 0.2 ± 0.4 | 0.0       | 0.0       | 0.0       | 0.0       | 0.2 ± 0.1 |
| Transgenic | Root        | 0.1 ± 0.0 | 21.5 ± 1.0 | 0.5 ± 0.0 | 4.4 ± 0.0 | 13.9 ± 0.8 | 0.5 ± 0.0 | 47.3 ± 1.1 | 5.3 ± 0.4   | 2.2 ± 0.1 | 0.3 ± 0.0 | 0.7 ± 0.1 | 1.8 ± 0.1 | 0.0       | 1.5 ± 0.1 | 1.4 ± 0.2 |

**Supplementary Table 6** Cuticular wax content ( $\mu\text{g}/\text{cm}^2$ ) and composition (% each molecular class) on the surface of wildtype (WT) and T<sub>1</sub> transgenic *Nicotiana tabacum* leaves. Error bars represent standard deviations (n=3).

|            | <b>Alkanes</b> | <b>Branched alkanes</b> | <b>Fatty acids</b> | <b>Fatty alcohols</b> | <b>Wax esters</b> | <b>Wax content</b> |
|------------|----------------|-------------------------|--------------------|-----------------------|-------------------|--------------------|
| WT         | 35.3           | 38.2                    | 25.2               | 1.1                   | 0.3               | 12.3 $\pm$ 2.3     |
| Transgenic | 43.0           | 30.7                    | 25.1               | 0.9                   | 0.3               | 8.1 $\pm$ 0.7      |
